# Supplementary material for: Evaluating probabilistic programming and fast variational Bayesian inference in phylogenetics
Source: PubMed Central journal article supplement (PMC6966998; doi:10.7717/peerj.8272), 2019-12-18

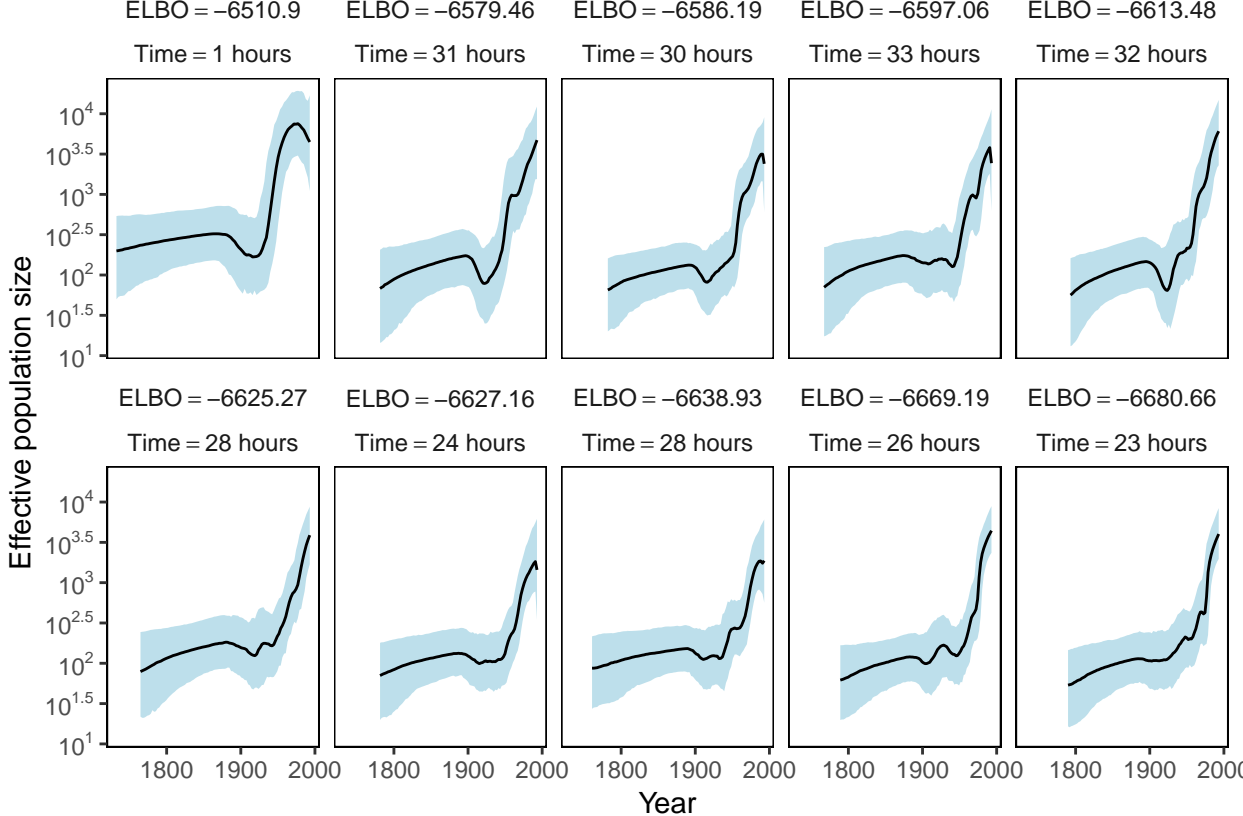

Supplement: peerj-07-8272-s002.pdf [file peerj-07-8272-s002.pdf]
